# Supplementary material for: Estimating Dengue Transmission Intensity in China Using Catalytic Models Based on Serological Data
Source: MDPI journal article supplement (doi:10.3390/tropicalmed8020116), 2023-02-14
Supplement: s1 [file s1]

---

## Supplementary Material

### Estimating Dengue transmission intensity in China using dynamics catalytic models based on serological data

Ning Li <sup>1,2</sup>, Haidong Li <sup>1,3</sup>, Zhengji Chen <sup>1,4</sup>, Huan Xiong <sup>1</sup>, Zhibo Li <sup>1</sup>, Tao Wei <sup>5</sup>, Wei Liu <sup>1</sup>, Xu-Sheng Zhang <sup>6,\*</sup>

<sup>1</sup> School of Public Health, Kunming Medical University, Kunming, Yunnan, P. R. China

<sup>2</sup> Centers for Disease Control and Prevention of Yunnan province, Kunming, P. R. China

<sup>3</sup> The Affiliated Hospital of Stomatology, Chongqing Medical University, Chongqing 401147, P.R. China

<sup>4</sup> Kunming Centers for Disease Control and Prevention, Kunming, Yunnan province, P. R. China

<sup>5</sup> Library, Kunming Medical University, Kunming, Yunnan, P. R. China

<sup>6</sup> Statistics, Modelling and Economics Department, Data, Analytics & Surveillance, UK Health Security Agency, London, UK.

\*Corresponding author: [Xu-Sheng.Zhang@ukhsa.gov.uk](mailto:Xu-Sheng.Zhang@ukhsa.gov.uk) (XZ)

## S2 Figures and Tables

### Content

|                                                               | page      |
|---------------------------------------------------------------|-----------|
| <b>1.Figures</b>                                              | <b>2</b>  |
| 1.1 Figure S1 The fitting curves of Model A to 31 datasets    | 3         |
| 1.2 Figure S2 The fitting curves of Model B to 31 datasets    | 4         |
| 1.3 Figure S3 The fitting curves of Model C to 31 datasets    | 5         |
| 1.4 Figure S4 The fitting curves of Model D to 31 datasets    | 6         |
| 1.5 Figure S5 Distribution of $R_0$ in different study years  | 7         |
| <b>2.Tables</b>                                               | <b>8</b>  |
| 2.1 Table S1 Summary of model parameter estimates for Model A | 8         |
| 2.2 Table S2 Summary of model parameter estimates for Model B | 10        |
| 2.3 Table S3 Summary of model parameter estimates for Model C | 12        |
| 2.4 Table S4 Summary of model parameter estimates for Model D | 14        |
| 2.5 Table S5 Comparison of DIC among four models              | 16        |
| <b>3. Reference</b>                                           | <b>18</b> |

---

## 1. Figures

Note that in Figures S1-S4, the blue dotted line, the green bold solid line, and the red dotted line are the 2.5%, 50% and 97.5% of the model fitting curves, respectively, and the red dots are the observation data. To make the graphs neat, the following abbreviations are used:

GZ Huangpu [4] represents Huangpu District in Guangzhou city;

QZ/FCG/HP [9] stands for Qinzhou City, Fangchenggang City and Hepu County in Guangxi;

GY/CJ/LD [15] represents Yunyan District of Guiyang City, Congjiang County of Southeast Guizhou Province and Luodian County of Guizhou province;

TP/TY/TN [20] indicates Taipei, Taoyuan and Tainan of Taiwan Province.

Figure S1. The fitting curves from the constant force of infection model (Model A) to 31 datasets

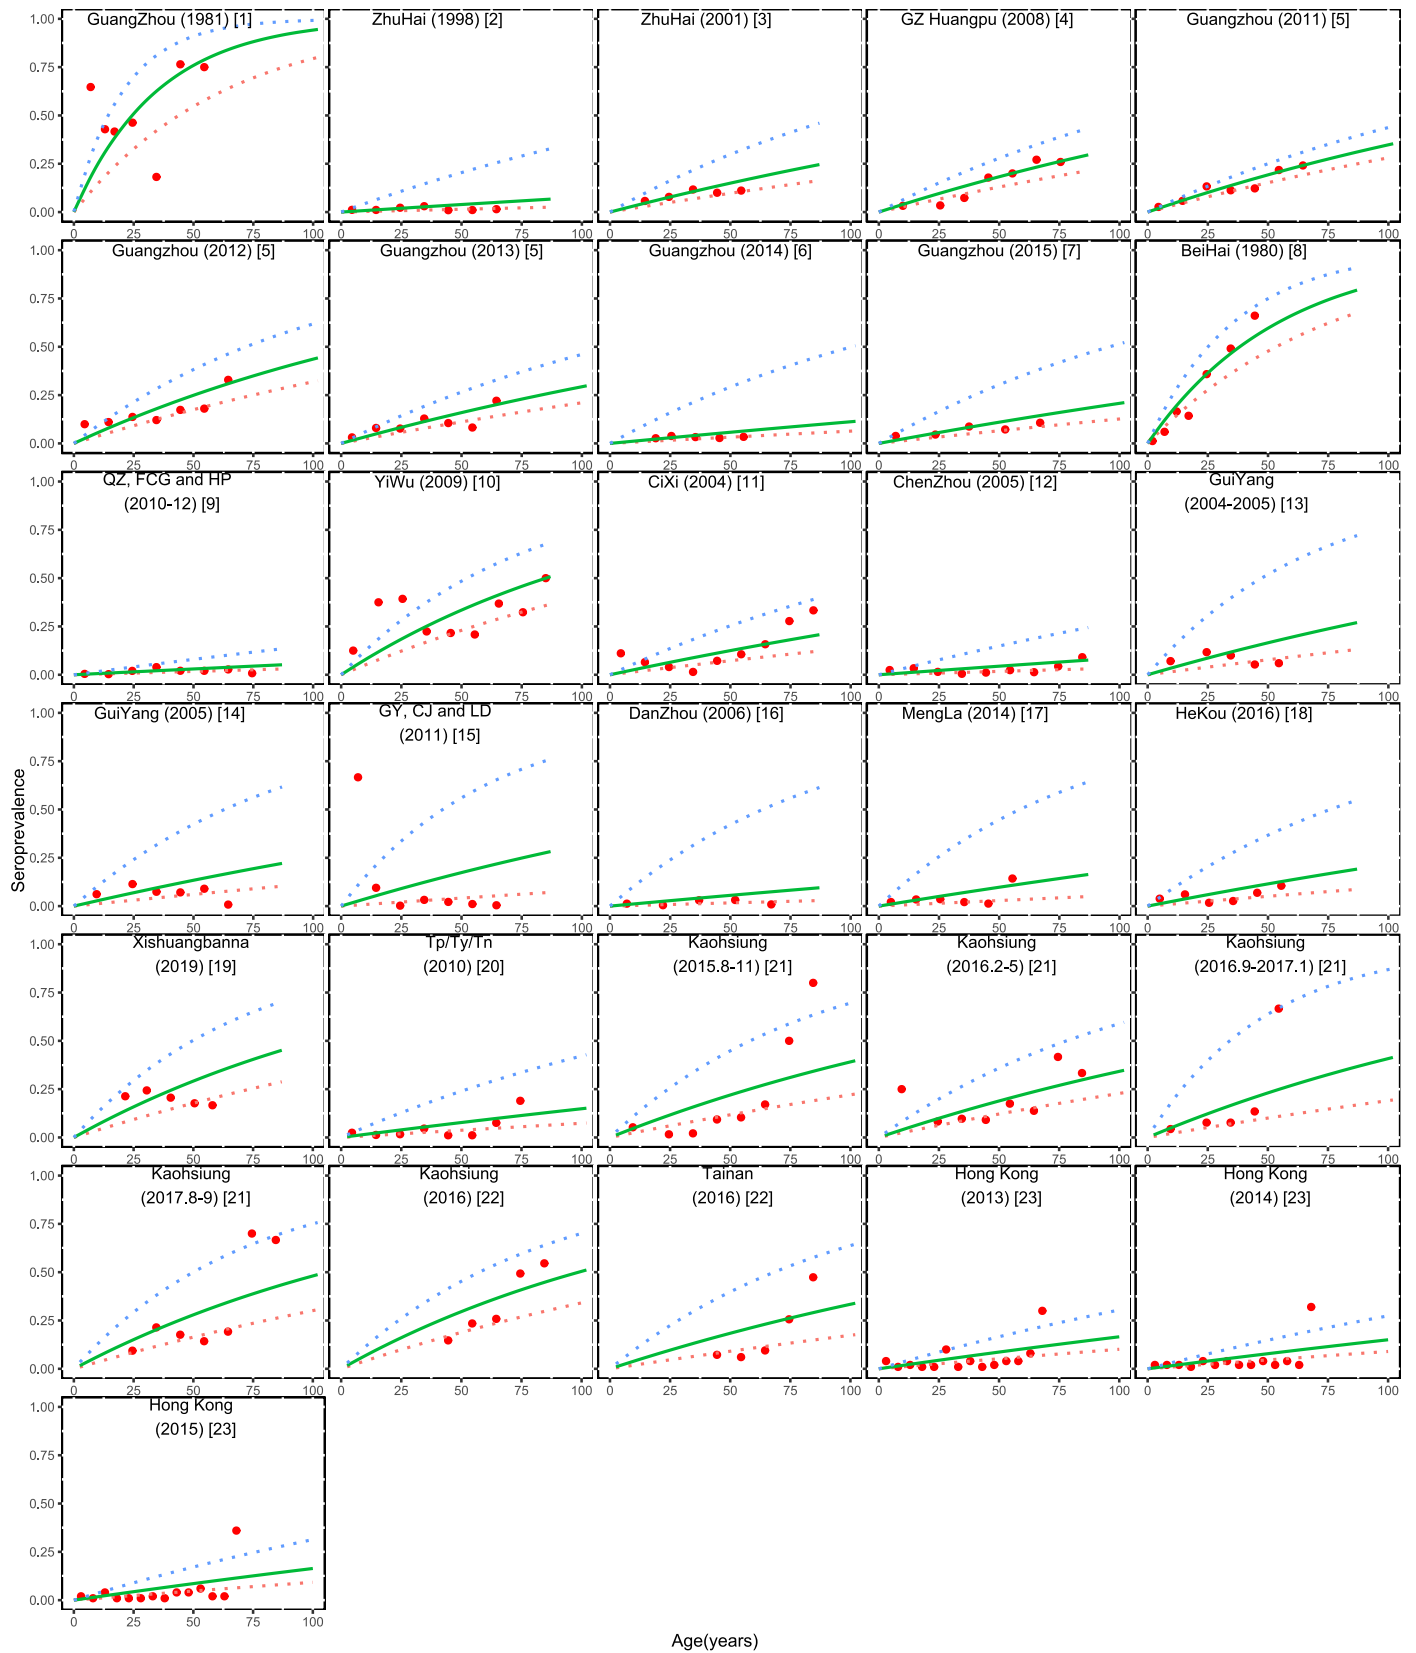

Figure S2. The fitting curves from the antibody protection decay model (Model B) to 31 datasets

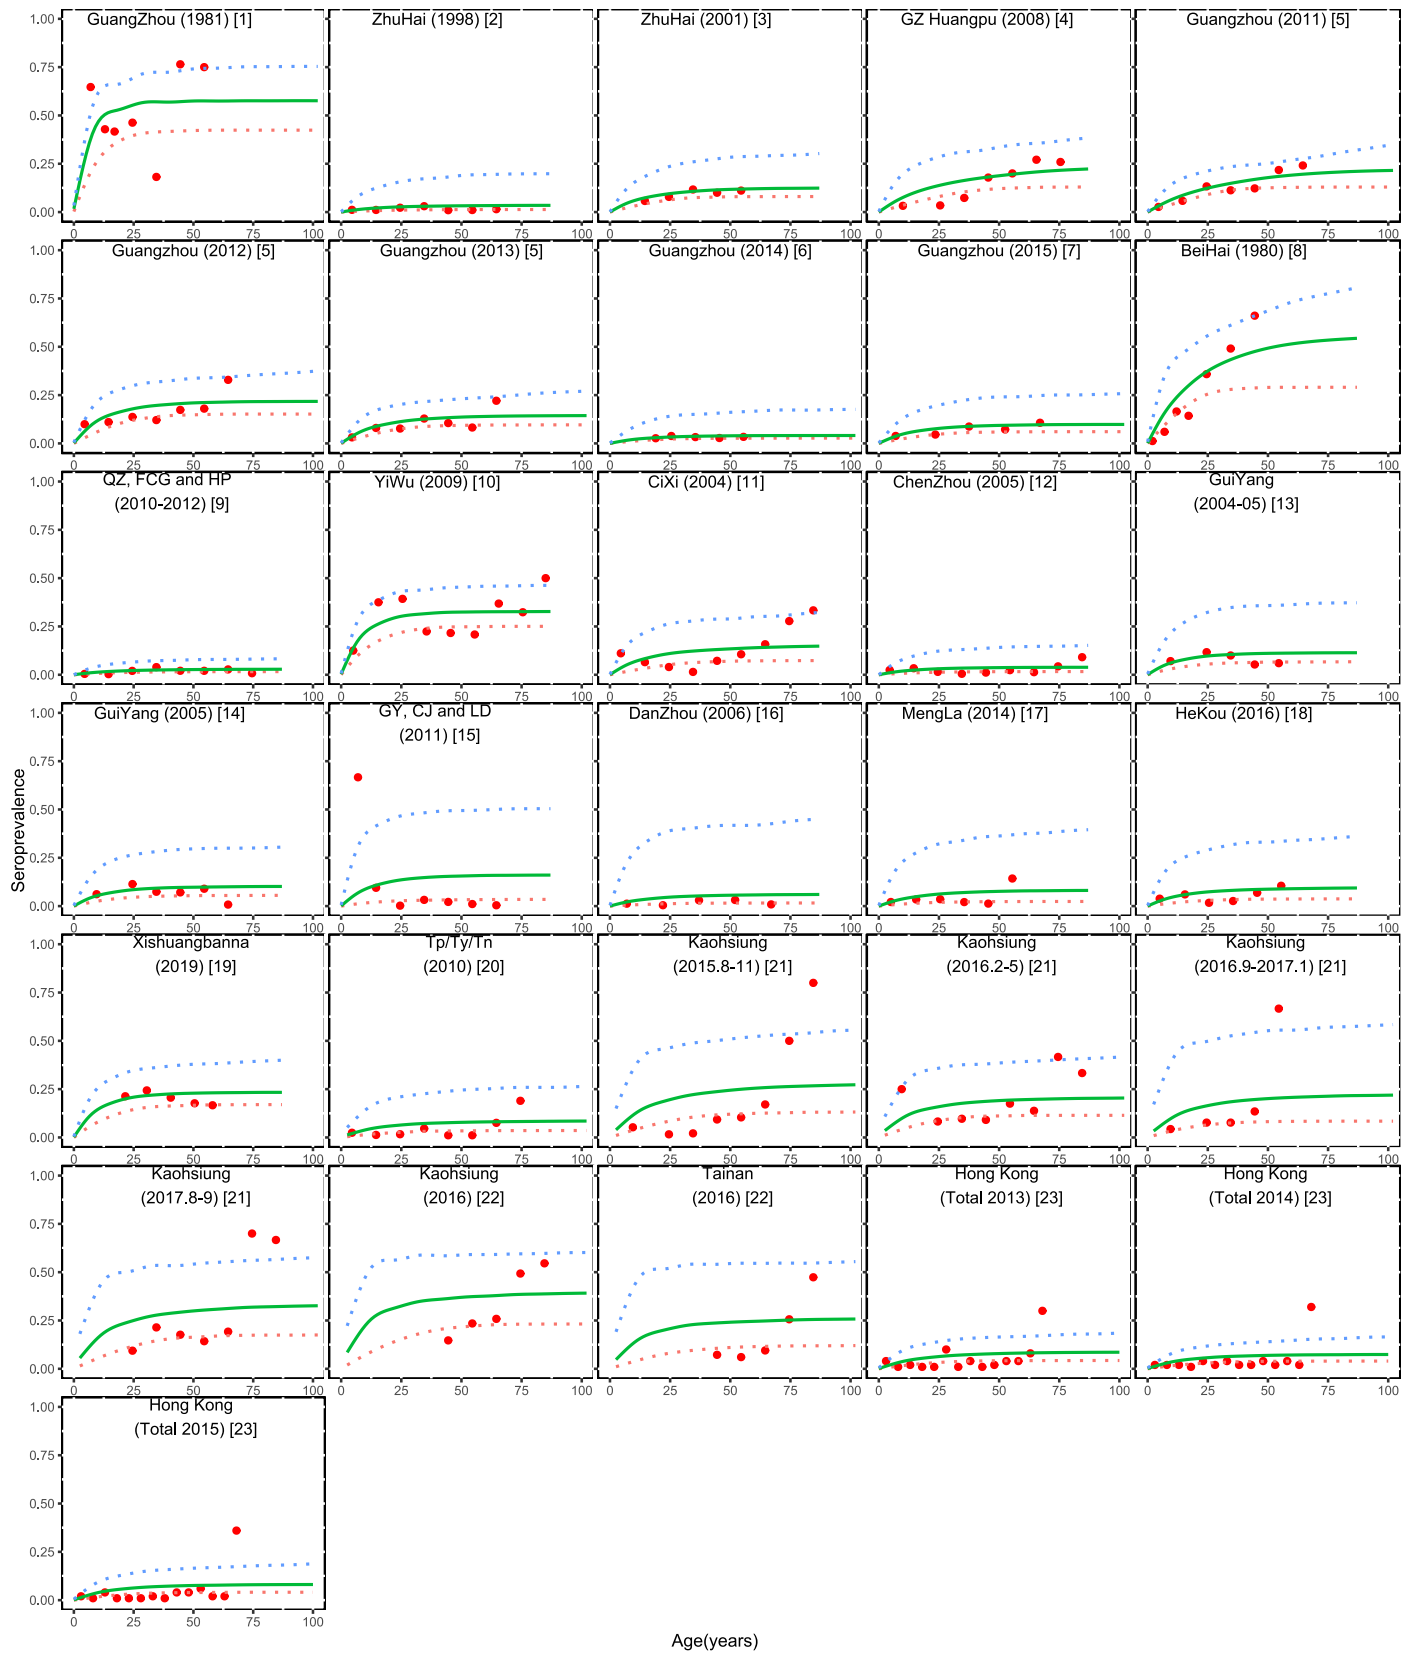

Figure S3. The fitting curves from the constant force of infection and age threshold model (Model C) to 31 datasets

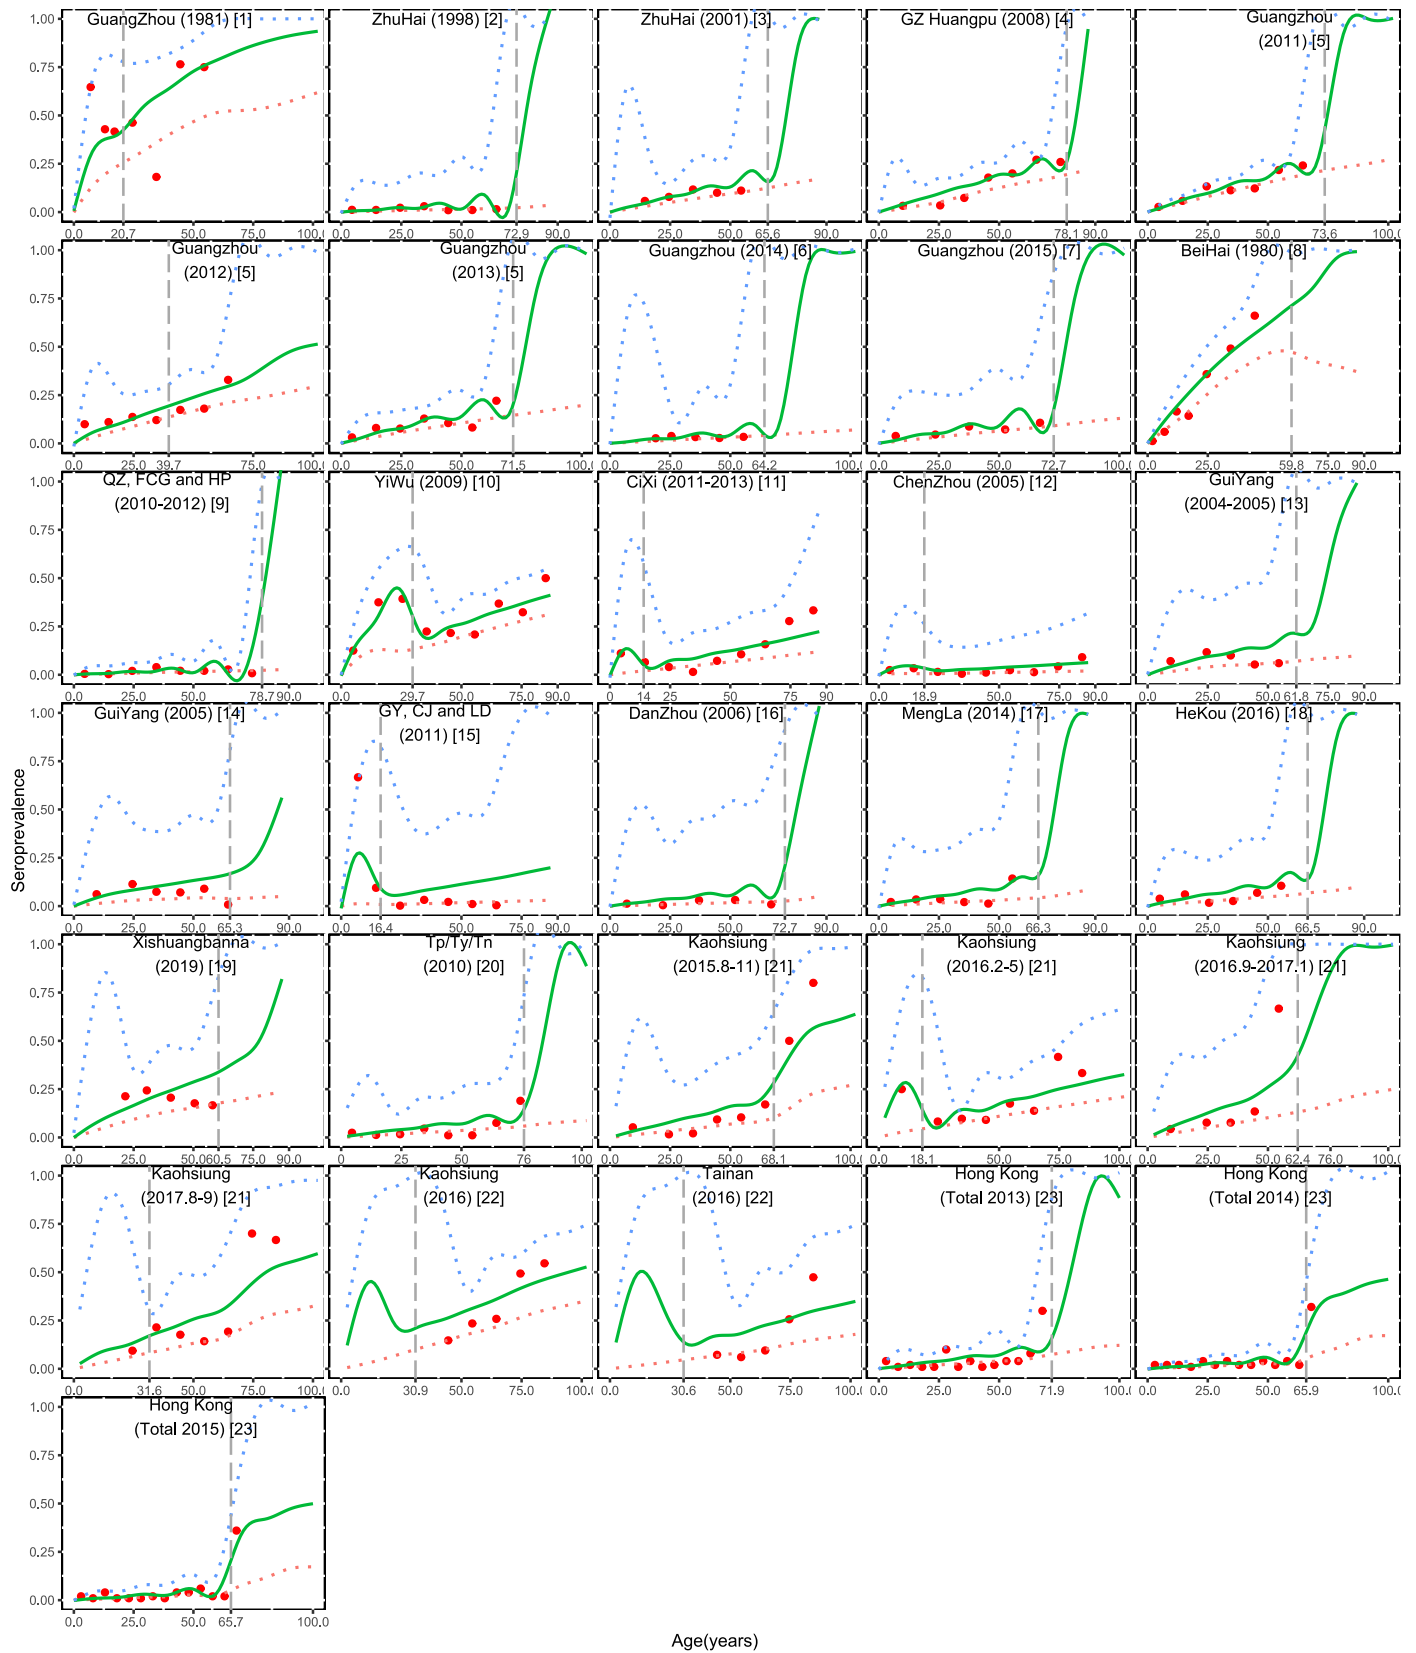

Figure S4. The fitting curves from the antibody protection decay and age threshold model (Model D) to 31 datasets

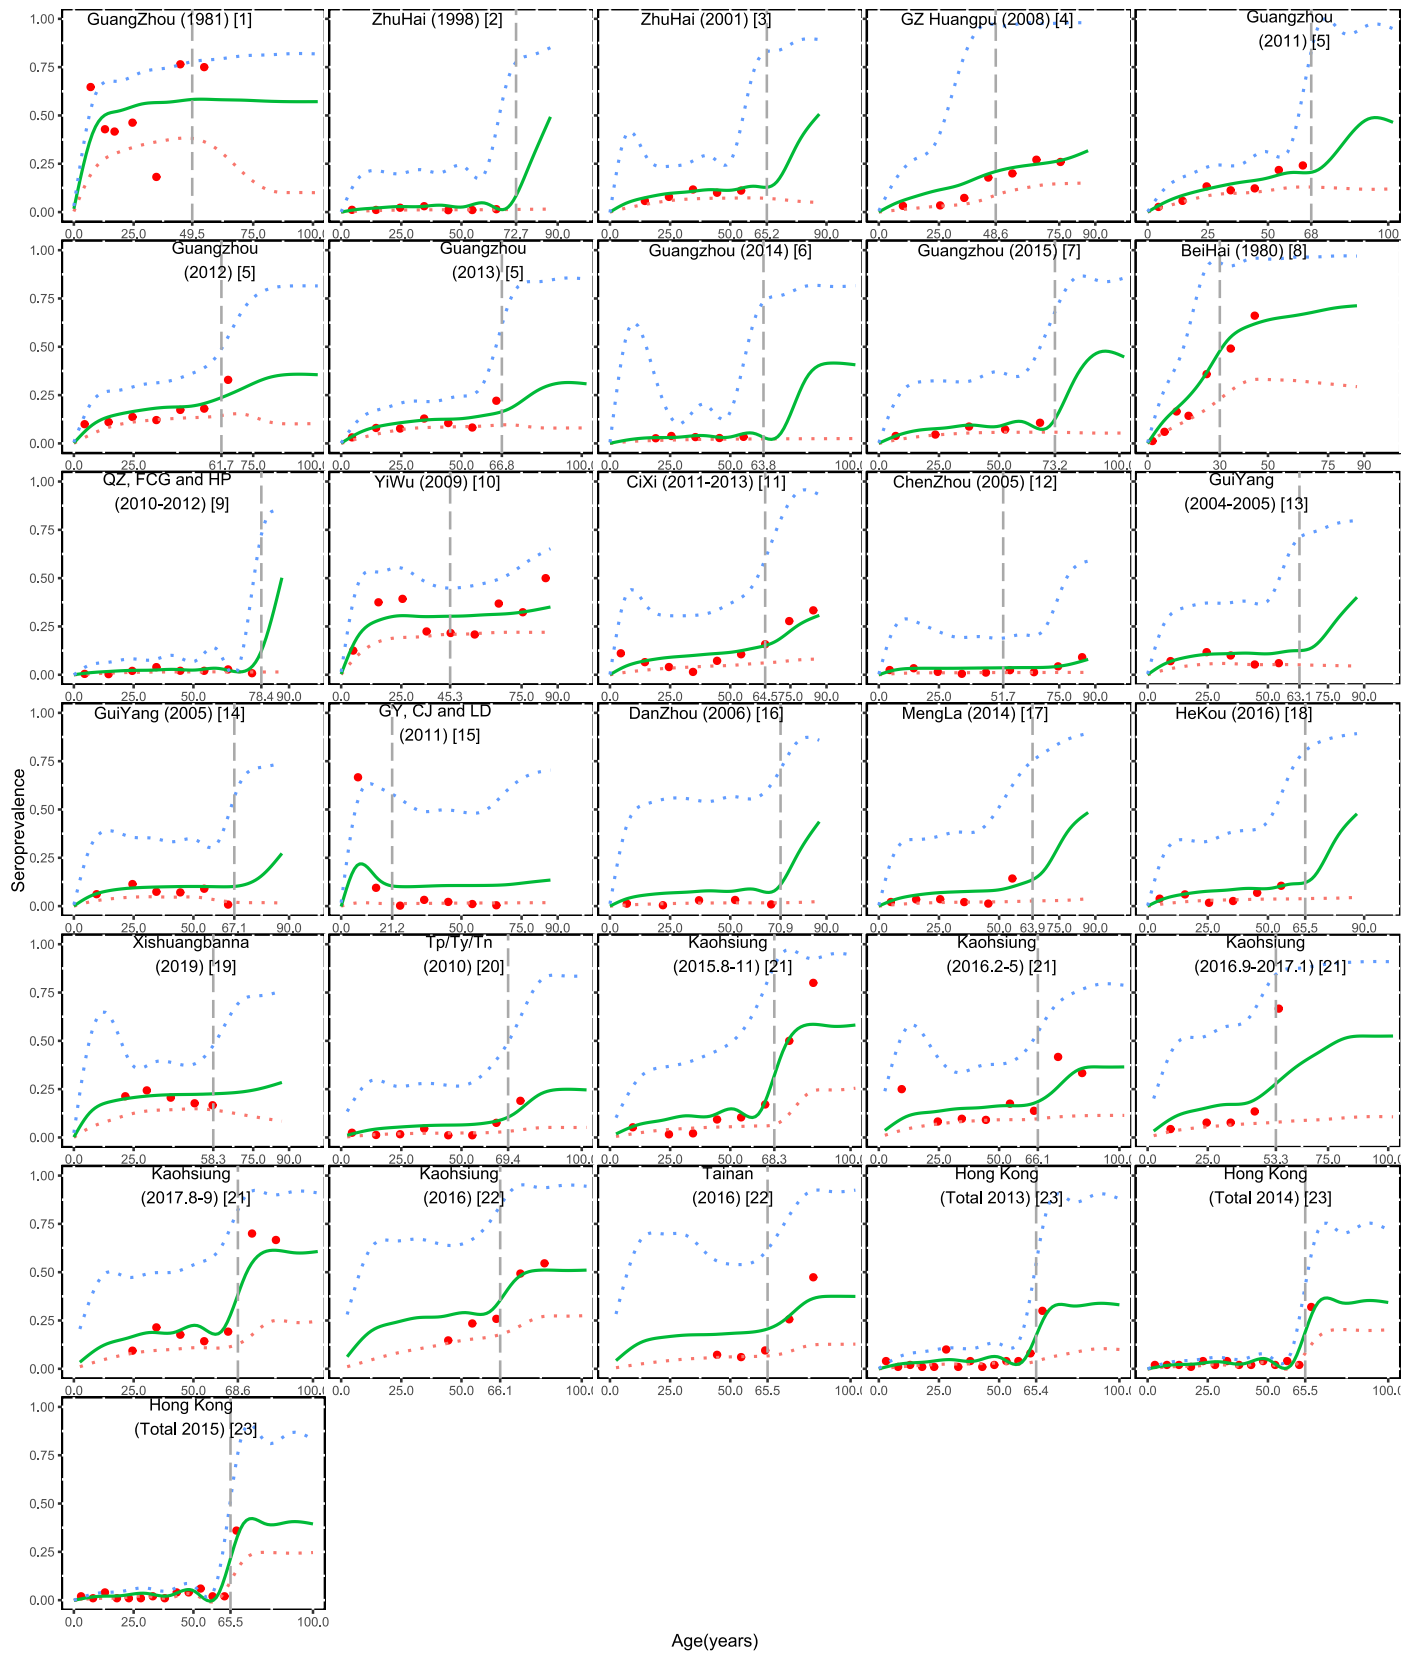

Figure S5. Distribution of  $R_0$  in different study years

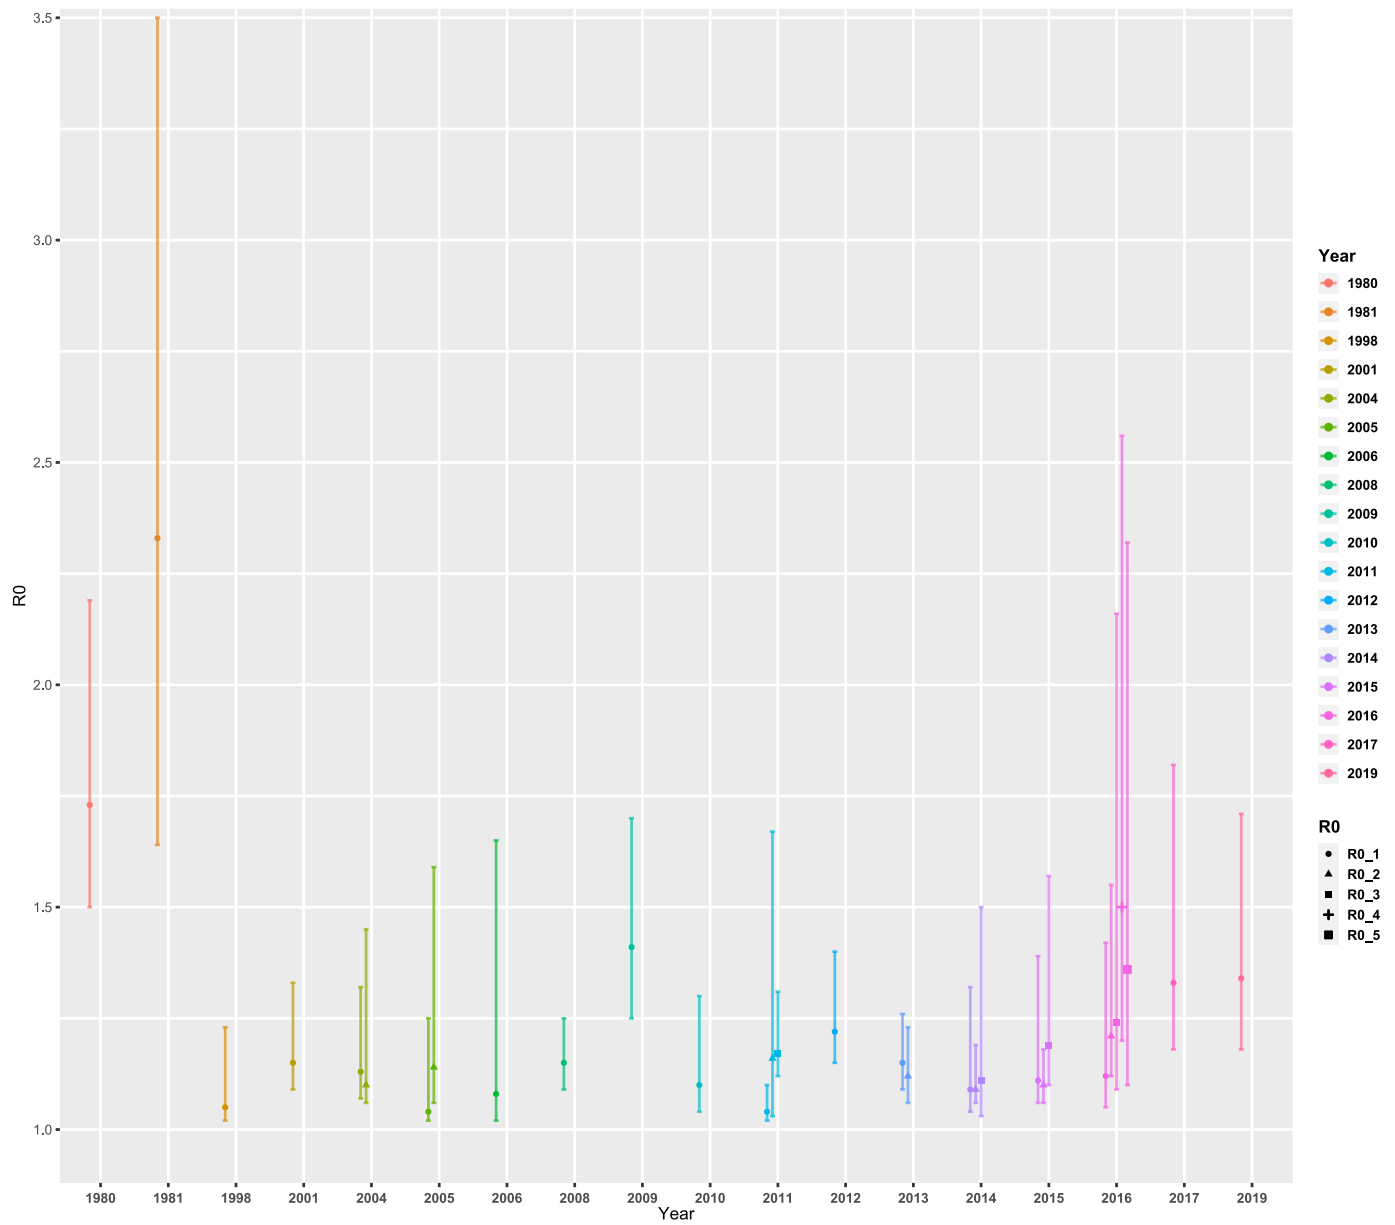

Note:  $R_{0\_1}$ ,  $R_{0\_2}$ ,  $R_{0\_3}$ ,  $R_{0\_4}$ ,  $R_{0\_5}$  are the basic reproduction numbers of different data sets in the same study year, respectively.

## 2. Tables

Table S1: Summary of model parameter estimates for the constant force of infection model (Model A)

| Survey region             | Reference           | Survey year | FOI ( $\lambda$ , 95%CrI) | R <sub>0</sub> (95%CrI) | $\gamma$ (95%CrI)  | -LnL   | DIC     |
|---------------------------|---------------------|-------------|---------------------------|-------------------------|--------------------|--------|---------|
| <b>Guangdong Province</b> |                     |             |                           |                         |                    |        |         |
| Guangzhou                 | Huang Y et al. [1]  | 1981        | 0.0285 (0.0158 , 0.0481)  | 2.35 (1.65 , 3.75)      | 0.20 (0.05 , 0.45) | 123.54 | 249.46  |
| Zhuhai                    | Li Z et al. [2]     | 1998        | 0.0008 (0.0003 , 0.0046)  | 1.03 (1.01 , 1.16)      | 0.04 (0.00 , 0.29) | 36.20  | 71.95   |
| Zhuhai                    | Yang Z et al. [3]   | 2001        | 0.0032 (0.0020 , 0.0071)  | 1.11 (1.07 , 1.25)      | 0.03 (0.00 , 0.20) | 172.46 | 345.07  |
| #GZ Huangpu               | Zheng X et al. [4]  | 2008        | 0.0040 (0.0028 , 0.0065)  | 1.14 (1.09 , 1.23)      | 0.03 (0.00 , 0.14) | 140.82 | 282.69  |
| Guangzhou                 | Cao Y et al. [5]    | 2011-13     |                           |                         |                    |        |         |
|                           |                     | 2011        | 0.0043 (0.0033 , 0.0058)  | 1.15 (1.12 , 1.21)      | 0.01 (0.00 , 0.05) | 603.41 | 1208.26 |
|                           |                     | 2012        | 0.0057 (0.0038 , 0.0096)  | 1.21 (1.14 , 1.37)      | 0.05 (0.01 , 0.18) | 519.23 | 1040.36 |
|                           |                     | 2013        | 0.0035 (0.0024 , 0.0062)  | 1.12 (1.08 , 1.23)      | 0.03 (0.00 , 0.12) | 392.85 | 787.48  |
| Guangzhou                 | Li S et al. [6]     | 2014        | 0.0012 (0.0007 , 0.0069)  | 1.04 (1.02 , 1.26)      | 0.05 (0.00 , 0.36) | 582.55 | 1164.52 |
| Guangzhou                 | Jing Q et al. [7]   | 2015        | 0.0023 (0.0014 , 0.0072)  | 1.08 (1.05 , 1.27)      | 0.05 (0.00 , 0.28) | 207.67 | 415.95  |
| <b>Guangxi Province</b>   |                     |             |                           |                         |                    |        |         |
| Beihai                    | Tian X et al. [8]   | 1980        | 0.0181 (0.0130 , 0.0277)  | 1.73 (1.50 , 2.19)      | 0.06 (0.00 , 0.20) | 208.16 | 418.28  |
| *QZ/FCG/HP                | Zhou K et al. [9]   | 2010-12     | 0.0006 (0.0004 , 0.0017)  | 1.02 (1.01 , 1.05)      | 0.02 (0.00 , 0.11) | 185.91 | 372.55  |
| <b>Zhejiang Province</b>  |                     |             |                           |                         |                    |        |         |
| Yiwu                      | Sun J et al. [10]   | 2009        | 0.0081 (0.0052 , 0.0133)  | 1.30 (1.19 , 1.52)      | 0.10 (0.02 , 0.25) | 221.27 | 444.86  |
| Cixi                      | Cen D et al. [11]   | 2004        | 0.0027 (0.0015 , 0.0058)  | 1.11 (1.06 , 1.24)      | 0.05 (0.00 , 0.20) | 127.22 | 256.27  |
| <b>Hunan Province</b>     |                     |             |                           |                         |                    |        |         |
| Chenzhou                  | Gao L et.al. [12]   | 2005        | 0.0009 (0.0004 , 0.0032)  | 1.03 (1.01 , 1.11)      | 0.05 (0.00 , 0.23) | 51.99  | 105.27  |
| <b>Guizhou Province</b>   |                     |             |                           |                         |                    |        |         |
| Guiyang                   | Gao R et al. [13]   | 2004-05     | 0.0036 (0.0016 , 0.0146)  | 1.13 (1.06 , 1.59)      | 0.10 (0.02 , 0.50) | 672.49 | 1346.25 |
| Guiyang                   | Tian H et al. [14]  | 2005        | 0.0029 (0.0012 , 0.0110)  | 1.10 (1.04 , 1.43)      | 0.10 (0.01 , 0.50) | 204.78 | 410.90  |
| *GY/CJ/LD                 | Jiang W et al. [15] | 2011        | 0.0038 (0.0008 , 0.0164)  | 1.14 (1.03 , 1.67)      | 0.30 (0.05 , 0.70) | 59.94  | 120.93  |
| <b>Hainan Province</b>    |                     |             |                           |                         |                    |        |         |
| Danzhou                   | Jin Y et al. [16]   | 2006        | 0.0011 (0.0003 , 0.0109)  | 1.04 (1.01 , 1.38)      | 0.12 (0.00 , 0.60) | 45.15  | 89.21   |
| <b>Yunnan Province</b>    |                     |             |                           |                         |                    |        |         |
| Mengla                    | Lu Y et al. [17]    | 2014        | 0.0021 (0.0006 , 0.0118)  | 1.07 (1.02 , 1.43)      | 0.10 (0.00 , 0.46) | 26.48  | 52.97   |
| Hekou                     | Pu L et al. [18]    | 2016        | 0.0024 (0.0010 , 0.0091)  | 1.08 (1.03 , 1.33)      | 0.07 (0.00 , 0.36) | 39.51  | 79.88   |

|                             |                     |               |                          |                    |                    |        |         |
|-----------------------------|---------------------|---------------|--------------------------|--------------------|--------------------|--------|---------|
| <b>Xishuangbanna</b>        | Li L et al. [19]    | 2019          | 0.0069 (0.0039 , 0.0140) | 1.28 (1.15 , 1.61) | 0.10 (0.02 , 0.36) | 1178.3 | 2358.14 |
| <b>Taiwan Province</b>      |                     |               |                          |                    |                    |        |         |
| <b>% TP/TY/TN</b>           | Lee YH et al. [20]  | 2010          | 0.0016 (0.0008 , 0.0055) | 1.07 (1.03 , 1.25) | 0.10 (0.01 , 0.30) | 184.93 | 374.11  |
| <b>Kaohsiung</b>            | Tsai JJ et al. [21] | 2015-17       |                          |                    |                    |        |         |
|                             |                     | 2015.8-11     | 0.0050 (0.0025 , 0.0119) | 1.23 (1.11 , 1.60) | 0.20 (0.04, 0.44)  | 128.97 | 260.08  |
|                             |                     | 2016.2-5      | 0.0042 (0.0026 , 0.0089) | 1.19 (1.11 , 1.43) | 0.06 (0.00, 0.26)  | 111.18 | 223.49  |
|                             |                     | 2016.9-2017.1 | 0.0052 (0.0021 , 0.0203) | 1.24 (1.09 , 2.16) | 0.10 (0.00, 0.52)  | 78.47  | 157.37  |
|                             |                     | 2017.8-9      | 0.0066 (0.0036 , 0.0139) | 1.31 (1.16 , 1.72) | 0.10 (0.01, 0.39)  | 69.62  | 141.19  |
| <b>Kaohsiung and Tainan</b> | Pan YH et al. [22]  | 2016          |                          |                    |                    |        |         |
| <b>Kaohsiung</b>            |                     |               | 0.0070 (0.0042 , 0.0121) | 1.33 (1.19 , 1.61) | 0.10 (0.02, 0.36)  | 961.22 | 1924.29 |
| <b>Tainan</b>               |                     |               | 0.0041 (0.0019 , 0.0102) | 1.18 (1.08 , 1.50) | 0.20 (0.04, 0.48)  | 858.61 | 1719.13 |
| <b>Hong Kong</b>            | Lee P et al. [23]   | 2013-15       |                          |                    |                    |        |         |
|                             |                     | 2013          | 0.0018 (0.0011 , 0.0036) | 1.08 (1.05 , 1.16) | 0.06 (0.01 , 0.16) | 132.91 | 267.96  |
|                             |                     | 2014          | 0.0016 (0.0009 , 0.0032) | 1.07 (1.04 , 1.14) | 0.05 (0.01 , 0.14) | 121.16 | 244.59  |
|                             |                     | 2015          | 0.0018 (0.0010 , 0.0038) | 1.08 (1.04 , 1.17) | 0.10 (0.02 , 0.20) | 118.30 | 238.80  |

Note: <sup>#</sup>GZ Huangpu represents Huangpu District in Guangzhou city; <sup>\$</sup>QZ/FCG/HP stands for Qinzhou City, Fangchenggang City and Hepu County in Guangxi; <sup>&</sup>GY/CJ/LD represents Yunyan District of Guiyang City, Congjiang County of Southeast Guizhou Province and Luodian County of Guizhou Province; <sup>%</sup>TP/TY/TN indicates Taipei, Taoyuan and Tainan of Taiwan Province.

Table S2: Summary of model parameter estimates of the antibody protection decay model (Model B)

| Survey region             | Reference           | Survey year | $\alpha$ (95%CrI)  | FOI ( $\lambda$ , 95%CrI) | $R_0$ (95%CrI)     | $\gamma$ (95%CrI)  | -LnL    | DIC     |
|---------------------------|---------------------|-------------|--------------------|---------------------------|--------------------|--------------------|---------|---------|
| <b>Guangdong Province</b> |                     |             |                    |                           |                    |                    |         |         |
| Guangzhou                 | Huang Y et al. [1]  | 1981        | 0.07 (0.02 , 0.10) | 0.0910 (0.0368 , 0.1456)  | 2.16 (1.64 , 3.05) | 0.10 (0.03 , 0.41) | 121.66  | 245.36  |
| Zhuhai                    | Li Z et al. [2]     | 1998        | 0.07 (0.01 , 0.10) | 0.0024 (0.0007 , 0.0162)  | 1.03 (1.01 , 1.18) | 0.05 (0.00 , 0.37) | 35.14   | 69.96   |
| Zhuhai                    | Yang Z et al. [3]   | 2001        | 0.06 (0.01 , 0.10) | 0.0083 (0.0034 , 0.0233)  | 1.11 (1.07 , 1.31) | 0.03 (0.00 , 0.22) | 171.83  | 343.78  |
| # GZ Huangpu              | Zheng X et al. [4]  | 2008        | 0.03 (0.00 , 0.10) | 0.0094 (0.0037 , 0.0326)  | 1.17 (1.10 , 1.40) | 0.07 (0.00 , 0.27) | 143.90  | 287.56  |
| Guangzhou                 | Cao Y et al. [5]    | 2011-13     |                    |                           |                    |                    |         |         |
|                           |                     | 2011        | 0.03 (0.00 , 0.09) | 0.0077 (0.0042 , 0.0223)  | 1.16 (1.12 , 1.27) | 0.03 (0.00 , 0.12) | 605.33  | 1210.97 |
|                           |                     | 2012        | 0.07 (0.01 , 0.10) | 0.0176 (0.0068 , 0.0367)  | 1.22 (1.15 , 1.41) | 0.05 (0.01 , 0.19) | 518.33  | 1038.56 |
|                           |                     | 2013        | 0.06 (0.01 , 0.10) | 0.0100 (0.0041 , 0.0229)  | 1.13 (1.09 , 1.25) | 0.03 (0.00 , 0.14) | 391.98  | 785.54  |
| Guangzhou                 | Li S et al. [6]     | 2014        | 0.07 (0.01 , 0.10) | 0.0030 (0.0014 , 0.0130)  | 1.03 (1.02 , 1.16) | 0.02 (0.00 , 0.21) | 579.54  | 1156.73 |
| Guangzhou                 | Jing Q et al. [7]   | 2015        | 0.07 (0.01 , 0.10) | 0.0069 (0.0027 , 0.0196)  | 1.09 (1.05 , 1.25) | 0.03 (0.00 , 0.23) | 205.89  | 411.70  |
| <b>Guangxi Province</b>   |                     |             |                    |                           |                    |                    |         |         |
| Beihai                    | Tian X et al. [8]   | 1980        | 0.02 (0.00 , 0.10) | 0.0269 (0.0148 , 0.0790)  | 1.62 (1.32 , 2.18) | 0.10 (0.01 , 0.37) | 211.03  | 422.83  |
| <sup>s</sup> QZ/FCG/HP    | Zhou K et al. [9]   | 2010-12     | 0.07 (0.02 , 0.10) | 0.0019 (0.0008 , 0.0062)  | 1.02 (1.01 , 1.06) | 0.02 (0.00 , 0.10) | 184.17  | 368.74  |
| <b>Zhejiang Province</b>  |                     |             |                    |                           |                    |                    |         |         |
| Yiwu                      | Sun J et al. [10]   | 2009        | 0.08 (0.03 , 0.10) | 0.0366 (0.0168 , 0.0636)  | 1.41 (1.28 , 1.69) | 0.05 (0.00 , 0.17) | 217.26  | 436.63  |
| Cixi                      | Cen D et al. [11]   | 2004        | 0.06 (0.00 , 0.10) | 0.0094 (0.0025 , 0.0300)  | 1.13 (1.06 , 1.36) | 0.10 (0.01 , 0.32) | 128.71  | 258.88  |
| <b>Hunan Province</b>     |                     |             |                    |                           |                    |                    |         |         |
| Chenzhou                  | Gao L et.al. [12]   | 2005        | 0.08 (0.02 , 0.10) | 0.0028 (0.0009 , 0.0113)  | 1.03 (1.01 , 1.13) | 0.04 (0.00 , 0.23) | 50.45   | 101.58  |
| <b>Guizhou Province</b>   |                     |             |                    |                           |                    |                    |         |         |
| Guiyang                   | Gao R et al. [13]   | 2004-05     | 0.08 (0.02 , 0.10) | 0.0092 (0.0038 , 0.0358)  | 1.10 (1.06 , 1.45) | 0.08 (0.01 , 0.38) | 669.62  | 1339.97 |
| Guiyang                   | Tian H et al. [14]  | 2005        | 0.08 (0.02 , 0.10) | 0.0082 (0.0032 , 0.0316)  | 1.09 (1.05 , 1.34) | 0.08 (0.00 , 0.39) | 201.53  | 403.67  |
| & GY/CJ/LD                | Jiang W et al. [15] | 2011        | 0.08 (0.02 , 0.10) | 0.0128 (0.0021 , 0.0697)  | 1.15 (1.03 , 1.81) | 0.30 (0.04 , 0.71) | 58.17   | 117.36  |
| <b>Hainan Province</b>    |                     |             |                    |                           |                    |                    |         |         |
| Danzhou                   | Jin Y et al. [16]   | 2006        | 0.07 (0.01 , 0.10) | 0.0039 (0.0008 , 0.0455)  | 1.05 (1.01 , 1.55) | 0.10 (0.00 , 0.64) | 45.10   | 88.84   |
| <b>Yunnan Province</b>    |                     |             |                    |                           |                    |                    |         |         |
| Mengla                    | Lu Y et al. [17]    | 2014        | 0.07 (0.01 , 0.10) | 0.0052 (0.0013 , 0.0389)  | 1.06 (1.02 , 1.42) | 0.10 (0.00 , 0.50) | 26.05   | 51.99   |
| Hekou                     | Pu L et al. [18]    | 2016        | 0.07 (0.01 , 0.10) | 0.0065 (0.0018 , 0.0363)  | 1.08 (1.03 , 1.38) | 0.08 (0.00 , 0.43) | 39.24   | 79.23   |
| Xishuangbanna             | Li L et al. [19]    | 2019        | 0.08 (0.02 , 0.10) | 0.0229 (0.0097 , 0.0450)  | 1.25 (1.17 , 1.49) | 0.04 (0.03 , 0.23) | 1174.73 | 2349.94 |
| <b>Taiwan Province</b>    |                     |             |                    |                           |                    |                    |         |         |

|                      |                     |               |                    |                          |                    |                    |        |         |
|----------------------|---------------------|---------------|--------------------|--------------------------|--------------------|--------------------|--------|---------|
| % TP/TY/TN           | Lee YH et al. [20]  | 2010          | 0.07 (0.01 , 0.10) | 0.0056 (0.0016 , 0.0228) | 1.07 (1.03 , 1.27) | 0.10 (0.02 , 0.38) | 185.17 | 371.79  |
| Kaohsiung            | Tsai JJ et al. [21] | 2015-17       |                    |                          |                    |                    |        |         |
|                      |                     | 2015.8-11     | 0.05 (0.00 , 0.10) | 0.0167 (0.0042 , 0.0682) | 1.28 (1.12 , 1.87) | 0.20 (0.07 , 0.54) | 130.86 | 263.05  |
|                      |                     | 2016.2-5      | 0.07 (0.01 , 0.10) | 0.0151 (0.0048 , 0.0487) | 1.21 (1.11 , 1.56) | 0.10 (0.00 , 0.31) | 111.74 | 225.02  |
|                      |                     | 2016.9-2017.1 | 0.06 (0.07 , 0.10) | 0.0143 (0.0039 , 0.0785) | 1.22 (1.08 , 2.03) | 0.10 (0.00 , 0.55) | 78.95  | 158.18  |
|                      |                     | 2017.8-9      | 0.06 (0.00 , 0.10) | 0.0239 (0.0059 , 0.0851) | 1.37 (1.17 , 2.04) | 0.20 (0.02 , 0.46) | 71.24  | 143.92  |
| Kaohsiung and Tainan | Pan YH et al. [22]  | 2016          |                    |                          |                    |                    |        |         |
| Kaohsiung            |                     |               | 0.06 (0.01 , 0.10) | 0.0366 (0.0079 , 0.1062) | 1.51 (1.24 , 2.28) | 0.20 (0.04 , 0.46) | 963.13 | 1927.82 |
| Tainan               |                     |               | 0.07 (0.01 , 0.10) | 0.0204 (0.0043 , 0.0883) | 1.28 (1.11 , 2.07) | 0.20 (0.06 , 0.59) | 859.77 | 1721.15 |
| Hong Kong            | Lee P et al. [23]   | 2013-15       |                    |                          |                    |                    |        |         |
|                      |                     | 2013          | 0.06 (0.01 , 0.10) | 0.0053 (0.0018 , 0.0148) | 1.07 (1.04 , 1.17) | 0.10 (0.02 , 0.21) | 133.24 | 268.73  |
|                      |                     | 2014          | 0.07 (0.01 , 0.10) | 0.0051 (0.0018 , 0.0123) | 1.07 (1.04 , 1.14) | 0.10 (0.02 , 0.17) | 120.86 | 244.05  |
|                      |                     | 2015          | 0.07 (0.01 , 0.10) | 0.0054 (0.0019 , 0.0146) | 1.07 (1.04 , 1.17) | 0.10 (0.02 , 0.26) | 118.23 | 238.72  |

Note: # GZ Huangpu represents Huangpu District in Guangzhou city; \$ QZ/FCG/HP stands for Qinzhou City, Fangchenggang City and Hepu County in Guangxi; & GY/CJ/LD represents Yunyan

District of Guiyang City, Congjiang County of Southeast Guizhou Province and Luodian County of Guizhou Province; % TP/TY/TN indicates Taipei, Taoyuan and Tainan of Taiwan Province.

Table S3: Summary of model parameter estimates from constant force of infection and age threshold model (Model C)

| Survey region             | Reference           | Survey year | $A_{crit}$ (95%CI) | $\lambda_1$ (95%CrI)    | $\lambda_2$ (95%CrI)    | $R_0$ (95%CrI)    | $\gamma$ (95%CrI) | -LnL    | DIC     |
|---------------------------|---------------------|-------------|--------------------|-------------------------|-------------------------|-------------------|-------------------|---------|---------|
| <b>Guangdong Province</b> |                     |             |                    |                         |                         |                   |                   |         |         |
| Guangzhou                 | Huang Y et al. [1]  | 1981        | 20.7 (9.9, 82.1)   | 0.0538 (0.0184, 0.1440) | 0.0269 (0.0094, 0.1348) | 2.33 (1.64, 3.50) | 0.10 (0.02, 0.41) | 122.80  | 240.45  |
| Zhuhai                    | Li Z et al. [2]     | 1998        | 72.9 (11.6, 83.8)  | 0.0009 (0.0003, 0.0236) | 0.0595 (0.0004, 0.1447) | 1.05 (1.02, 1.23) | 0.05 (0.00, 0.39) | 35.26   | 61.68   |
| Zhuhai                    | Yang Z et al. [3]   | 2001        | 65.6 (10.3, 83.3)  | 0.0034 (0.0021, 0.1238) | 0.0585 (0.0022, 0.1448) | 1.15 (1.09, 1.33) | 0.04 (0.00, 0.23) | 172.53  | 294.39  |
| # GZ Huangpu              | Zheng X et al. [4]  | 2008        | 78.1 (9.9, 84.1)   | 0.0041 (0.0019, 0.0533) | 0.0428 (0.0028, 0.1446) | 1.15 (1.09, 1.25) | 0.03 (0.00, 0.16) | 140.92  | 177.13  |
| Guangzhou                 | Cao Y et al. [5]    | 2011-13     |                    |                         |                         |                   |                   |         |         |
|                           |                     | 2011        | 73.6 (15.6, 84.0)  | 0.0043 (0.0034, 0.0073) | 0.0669 (0.0032, 0.1465) | 1.18 (1.13, 1.25) | 0.01 (0.00, 0.06) | 603.45  | 1207.90 |
|                           |                     | 2012        | 39.7 (9.9, 83.1)   | 0.0078 (0.0041, 0.0598) | 0.0071 (0.0034, 0.1400) | 1.22 (1.15, 1.40) | 0.05 (0.00, 0.18) | 518.73  | 955.25  |
|                           |                     | 2013        | 71.5 (12.2, 83.9)  | 0.0037 (0.0024, 0.0175) | 0.0532 (0.0022, 0.1447) | 1.15 (1.09, 1.26) | 0.03 (0.00, 0.14) | 392.87  | 717.46  |
| Guangzhou                 | Li S et al. [6]     | 2014        | 64.2 (10.4, 83.7)  | 0.0014 (0.0007, 0.1331) | 0.0476 (0.0007, 0.1450) | 1.09 (1.04, 1.32) | 0.05 (0.00, 0.38) | 582.51  | 966.85  |
| Guangzhou                 | Jing Q et al. [7]   | 2015        | 72.7 (11.7, 84.0)  | 0.0027 (0.0014, 0.0308) | 0.0517 (0.0014, 0.1444) | 1.11 (1.06, 1.39) | 0.06 (0.00, 0.37) | 207.78  | 355.98  |
| <b>Guangxi Province</b>   |                     |             |                    |                         |                         |                   |                   |         |         |
| Beihai                    | Tian X et al. [8]   | 1980        | 59.8 (17.1, 83.1)  | 0.0176 (0.0102, 0.0277) | 0.0560 (0.0054, 0.1452) | 1.80 (1.51, 2.26) | 0.05 (0.00, 0.20) | 208.12  | 417.75  |
| \$ QZ/FCG/HP              | Zhou K et al. [9]   | 2010-12     | 78.7 (13.1, 84.2)  | 0.0006 (0.0003, 0.0064) | 0.0606 (0.0003, 0.1450) | 1.04 (1.02, 1.10) | 0.02 (0.00, 0.16) | 185.87  | 193.52  |
| <b>Zhejiang Province</b>  |                     |             |                    |                         |                         |                   |                   |         |         |
| Yiwu                      | Sun J et al. [10]   | 2009        | 29.7 (16.1, 42.0)  | 0.0252 (0.0122, 0.0559) | 0.0061 (0.0043, 0.0093) | 1.41 (1.25, 1.70) | 0.04 (0.00, 0.15) | 215.09  | 433.33  |
| Cixi                      | Cen D et al. [11]   | 2004        | 14.0 (9.7, 81.9)   | 0.0238 (0.0016, 0.1317) | 0.0029 (0.0015, 0.0205) | 1.13 (1.07, 1.32) | 0.07 (0.00, 0.24) | 127.08  | 218.66  |
| <b>Hunan Province</b>     |                     |             |                    |                         |                         |                   |                   |         |         |
| Chenzhou                  | Gao L et al. [12]   | 2005        | 18.9 (9.9, 75.4)   | 0.0055 (0.0009, 0.0514) | 0.0007 (0.0002, 0.0044) | 1.04 (1.01, 1.20) | 0.06 (0.00, 0.32) | 50.64   | 101.25  |
| <b>Guizhou Province</b>   |                     |             |                    |                         |                         |                   |                   |         |         |
| Guiyang                   | Gao R et al. [13]   | 2004-05     | 61.8 (11.5, 83.3)  | 0.0046 (0.0017, 0.0489) | 0.0393 (0.0012, 0.1453) | 1.18 (1.07, 1.73) | 0.10 (0.01, 0.51) | 672.33  | 1339.04 |
| Guiyang                   | Tian H et al. [14]  | 2005        | 65.3 (11.4, 83.6)  | 0.0047 (0.0014, 0.0669) | 0.0094 (0.0006, 0.1426) | 1.14 (1.06, 1.59) | 0.10 (0.01, 0.55) | 204.61  | 362.19  |
| & GY/CJ/LD                | Jiang W et al. [15] | 2011        | 16.4 (9.9, 80.8)   | 0.0469 (0.0020, 0.1449) | 0.0025 (0.0004, 0.1269) | 1.16 (1.03, 1.67) | 0.20 (0.02, 0.65) | 57.27   | 80.41   |
| <b>Hainan Province</b>    |                     |             |                    |                         |                         |                   |                   |         |         |
| Danzhou                   | Jin Y et al. [16]   | 2006        | 72.7 (11.3, 84.0)  | 0.0017 (0.0004, 0.0706) | 0.0462 (0.0006, 0.1447) | 1.08 (1.02, 1.65) | 0.10 (0.00, 0.68) | 46.05   | 53.5    |
| <b>Yunnan Province</b>    |                     |             |                    |                         |                         |                   |                   |         |         |
| Mengla                    | Lu Y et al. [17]    | 2014        | 66.3 (11.1, 83.4)  | 0.0024 (0.0007, 0.0554) | 0.0538 (0.0010, 0.1448) | 1.11 (1.03, 1.50) | 0.10 (0.00, 0.50) | 26.54   | 46.74   |
| Hekou                     | Pu L et al. [18]    | 2016        | 66.5 (11.0, 83.7)  | 0.0028 (0.0011, 0.0409) | 0.0551 (0.0012, 0.1441) | 1.12 (1.05, 1.42) | 0.08 (0.00, 0.39) | 39.58   | 72.62   |
| Xishuangbanna             | Li L et al. [19]    | 2019        | 60.5 (10.9, 83.3)  | 0.0086 (0.0040, 0.1340) | 0.0199 (0.0031, 0.1439) | 1.34 (1.18, 1.71) | 0.10 (0.01, 0.38) | 1178.12 | 2321.00 |
| <b>Taiwan Province</b>    |                     |             |                    |                         |                         |                   |                   |         |         |

|                         |                     |               |                    |                          |                          |                    |                    |        |         |
|-------------------------|---------------------|---------------|--------------------|--------------------------|--------------------------|--------------------|--------------------|--------|---------|
| % TP/TY/TN              | Lee YH et al. [20]  | 2010          | 76.00 (10.2,84.0)  | 0.0021 (0.0008 , 0.0545) | 0.0262 (0.0009 , 0.1436) | 1.10 (1.04 , 1.30) | 0.10 (0.01 , 0.33) | 184.95 | 278.49  |
| <b>Kaohsiung</b>        | Tsai JJ et al. [21] | 2015-17       |                    |                          |                          |                    |                    |        |         |
|                         |                     | 2015.8-11     | 68.1 (11.4 , 83.1) | 0.0034 (0.0014 , 0.0782) | 0.0099 (0.0031 , 0.0419) | 1.19 (1.10 , 1.57) | 0.10 (0.00 , 0.43) | 127.49 | 238.28  |
|                         |                     | 2016.2-5      | 18.1 (10.0 , 76.2) | 0.0389 (0.0033 , 0.1195) | 0.0039 (0.0023 , 0.0108) | 1.23 (1.13 , 1.47) | 0.05 (0.00 , 0.23) | 109.39 | 220.42  |
|                         |                     | 2016.9-2017.1 | 62.4 (12.8 , 83.3) | 0.0057 (0.0021 , 0.0539) | 0.0493 (0.0028 , 0.1449) | 1.44 (1.14 , 2.38) | 0.10 (0.00 , 0.51) | 78.63  | 155.99  |
|                         |                     | 2017.8-9      | 31.6 (10.3 , 81.5) | 0.0097 (0.0026 , 0.1428) | 0.0089 (0.0039 , 0.0370) | 1.33 (1.18 , 1.82) | 0.10 (0.00 , 0.38) | 69.28  | 114.74  |
| <b>Kaohsiung/Tainan</b> | Pan YH et al. [22]  | 2016          |                    |                          |                          |                    |                    |        |         |
| <b>Kaohsiung</b>        |                     |               | 30.9 (10.5 , 74.3) | 0.0553 (0.0026 , 0.1447) | 0.0073 (0.0043 , 0.0133) | 1.50 (1.20 , 2.56) | 0.10 (0.00 , 0.36) | 961.12 | 1922.57 |
| <b>Tainan</b>           |                     |               | 30.6 (10.2 , 79.7) | 0.0617 (0.0015 , 0.1461) | 0.0042 (0.0019 , 0.0133) | 1.36 (1.10 , 2.32) | 0.10 (0.03 , 0.48) | 858.53 | 1718.03 |
| <b>Hong Kong</b>        | Lee P et al. [23]   | 2013-15       |                    |                          |                          |                    |                    |        |         |
|                         |                     | 2013          | 71.9 (44.8 , 83.8) | 0.0017 (0.0008 , 0.0128) | 0.0299 (0.0013 , 0.1450) | 1.12 (1.06 , 1.23) | 0.05 (0.00 , 0.18) | 132.62 | 233.79  |
|                         |                     | 2014          | 65.9 (30.2 , 81.5) | 0.0010 (0.0005 , 0.0037) | 0.0063 (0.0019 , 0.1252) | 1.09 (1.06 , 1.19) | 0.02 (0.00 , 0.09) | 113.46 | 213.28  |
|                         |                     | 2015          | 65.7 (17.6 , 81.8) | 0.0009 (0.0005 , 0.0057) | 0.0070 (0.0019 , 0.1263) | 1.10 (1.06 , 1.18) | 0.02 (0.00 , 0.12) | 109.87 | 213.16  |

Note: # GZ Huangpu represents Huangpu District in Guangzhou city; \$ QZ/FCG/HP stands for Qinzhou City, Fangchenggang City and Hepu County in Guangxi; & GY/CJ/LD represents Yunyan

District of Guiyang City, Congjiang County of Southeast Guizhou Province and Luodian County of Guizhou Province; % TP/TY/TN indicates Taipei, Taoyuan and Tainan of Taiwan Province.

Table S4: Summary of model parameter estimates from antibody protection decay and age threshold model (Model D)

| Survey region             | Reference           | Survey  | $A_{crit}$ (95%CrI)  | $\alpha$ (95%CrI)    | $\lambda_1$ (95%CrI)       | $\lambda_2$ (95%CrI)       | $R_0$ (95%CrI)       | $\gamma$ (95%CrI)    | -LnL   | DIC     |
|---------------------------|---------------------|---------|----------------------|----------------------|----------------------------|----------------------------|----------------------|----------------------|--------|---------|
| <b>Guangdong Province</b> |                     |         |                      |                      |                            |                            |                      |                      |        |         |
| Guangzhou                 | Huang Y et al. [1]  | 1981    | 49.5<br>(10.9, 82.8) | 0.07<br>(0.02, 0.10) | 0.0904<br>(0.0361, 0.1444) | 0.0873<br>(0.0071, 0.1471) | 2.13<br>(1.58, 3.06) | 0.10<br>(0.02, 0.40) | 121.71 | 245.20  |
| Zhuhai                    | Li Z et al. [2]     | 1998    | 72.7<br>(13.0, 83.9) | 0.07<br>(0.01, 0.10) | 0.0025<br>(0.0007, 0.0353) | 0.0588<br>(0.0010, 0.1458) | 1.04<br>(1.01, 1.25) | 0.06<br>(0.00, 0.45) | 85.41  | 68.96   |
| Zhuhai                    | Yang Z et al. [3]   | 2001    | 65.2<br>(11.2, 83.5) | 0.07<br>(0.01, 0.10) | 0.0086<br>(0.0033, 0.0916) | 0.0602<br>(0.0024, 0.1457) | 1.13<br>(1.08, 1.33) | 0.04<br>(0.00, 0.23) | 171.97 | 340.67  |
| # GZ Huangpu              | Zheng X et al. [4]  | 2008    | 48.6<br>(13.6, 83.3) | 0.06<br>(0.00, 0.10) | 0.0078<br>(0.0015, 0.0353) | 0.0284<br>(0.0055, 0.1369) | 1.17<br>(1.09, 2.00) | 0.06<br>(0.00, 0.28) | 143.07 | 280.55  |
| Guangzhou                 | Cao Y et al. [5]    | 2011-13 |                      |                      |                            |                            |                      |                      |        |         |
|                           |                     | 2011    | 68.0<br>(15.5, 83.3) | 0.04<br>(0.00, 0.10) | 0.0085<br>(0.0040, 0.0237) | 0.0356<br>(0.0039, 0.1442) | 1.17<br>(1.12, 1.31) | 0.03<br>(0.00, 0.14) | 605.08 | 1198.32 |
|                           |                     | 2012    | 61.7<br>(11.9, 83.1) | 0.07<br>(0.01, 0.10) | 0.0174<br>(0.0075, 0.0448) | 0.0415<br>(0.0054, 0.1407) | 1.22<br>(1.15, 1.42) | 0.04<br>(0.00, 0.20) | 517.77 | 1035.76 |
|                           |                     | 2013    | 66.8<br>(15.7, 83.7) | 0.07<br>(0.01, 0.10) | 0.0099<br>(0.0039, 0.0236) | 0.0329<br>(0.0048, 0.1441) | 1.14<br>(1.09, 1.26) | 0.03<br>(0.00, 0.15) | 391.61 | 778.47  |
| Guangzhou                 | Li S et al. [6]     | 2014    | 63.8<br>(10.4, 83.5) | 0.07<br>(0.01, 0.10) | 0.0034<br>(0.0014, 0.1353) | 0.0477<br>(0.0009, 0.1458) | 1.06<br>(1.03, 1.20) | 0.03<br>(0.00, 0.26) | 579.46 | 1054.96 |
| Guangzhou                 | Jing Q et al. [7]   | 2015    | 73.2<br>(14.0, 83.9) | 0.07<br>(0.01, 0.10) | 0.0073<br>(0.0027, 0.0455) | 0.0549<br>(0.0031, 0.1455) | 1.10<br>(1.06, 1.45) | 0.05<br>(0.00, 0.37) | 206.43 | 399.75  |
| <b>Guangxi Province</b>   |                     |         |                      |                      |                            |                            |                      |                      |        |         |
| Beihai                    | Tian X et al. [8]   | 1980    | 30.0<br>(12.0, 80.8) | 0.03<br>(0.00, 0.10) | 0.0199<br>(0.0095, 0.0585) | 0.0836<br>(0.0128, 0.1450) | 1.81<br>(1.40, 3.19) | 0.07<br>(0.00, 0.27) | 208.89 | 418.60  |
| \$ QZ/FCG/HP              | Zhou K et al. [9]   | 2010-12 | 78.4<br>(14.5, 84.2) | 0.07<br>(0.02, 0.10) | 0.0019<br>(0.0007, 0.0096) | 0.0594<br>(0.0008, 0.1450) | 1.03<br>(1.02, 1.09) | 0.02<br>(0.00, 0.14) | 184.32 | 309.73  |
| <b>Zhejiang Province</b>  |                     |         |                      |                      |                            |                            |                      |                      |        |         |
| Yiwu                      | Sun J et al. [10]   | 2009    | 45.3<br>(11.1, 83.3) | 0.08<br>(0.02, 0.10) | 0.0413<br>(0.0184, 0.1223) | 0.0415<br>(0.0103, 0.1333) | 1.42<br>(1.27, 1.76) | 0.05<br>(0.00, 0.19) | 217.04 | 432.83  |
| Cixi                      | Cen D et al. [11]   | 2004    | 64.5<br>(11.1, 83.2) | 0.07<br>(0.00, 0.10) | 0.0086<br>(0.0020, 0.0952) | 0.0294<br>(0.0040, 0.1363) | 1.13<br>(1.06, 1.45) | 0.10<br>(0.00, 0.34) | 128.1  | 252.85  |
| <b>Hunan Province</b>     |                     |         |                      |                      |                            |                            |                      |                      |        |         |
| Chenzhou                  | Gao L et al. [12]   | 2005    | 51.7<br>(10.3, 83.7) | 0.08<br>(0.02, 0.10) | 0.0047<br>(0.0011, 0.0537) | 0.0061<br>(0.0006, 0.1033) | 1.04<br>(1.02, 1.25) | 0.06<br>(0.00, 0.41) | 50.89  | 88.01   |
| <b>Guizhou Province</b>   |                     |         |                      |                      |                            |                            |                      |                      |        |         |
| Guiyang                   | Gao R et al. [13]   | 2004-05 | 63.1<br>(12.8, 83.6) | 0.08<br>(0.02, 0.10) | 0.0105<br>(0.0042, 0.0580) | 0.0458<br>(0.0030, 0.1442) | 1.13<br>(1.07, 1.52) | 0.09<br>(0.00, 0.44) | 669.78 | 1338.69 |
| Guiyang                   | Tian H et al. [14]  | 2005    | 67.1<br>(13.5, 83.5) | 0.08<br>(0.02, 0.10) | 0.0099<br>(0.0038, 0.0698) | 0.0259<br>(0.0011, 0.1442) | 1.11<br>(1.06, 1.46) | 0.10<br>(0.00, 0.44) | 201.76 | 392.70  |
| & GY/CJ/LD                | Jiang W et al. [15] | 2011    | 21.2<br>(9.8, 82.4)  | 0.07<br>(0.02, 0.10) | 0.0446<br>(0.0032, 0.1440) | 0.0110<br>(0.0009, 0.1362) | 1.15<br>(1.03, 1.78) | 0.20<br>(0.02, 0.68) | 57.11  | 103.69  |
| <b>Hainan Province</b>    |                     |         |                      |                      |                            |                            |                      |                      |        |         |

|                         |                     |               |                       |                       |                             |                             |                       |                       |         |         |
|-------------------------|---------------------|---------------|-----------------------|-----------------------|-----------------------------|-----------------------------|-----------------------|-----------------------|---------|---------|
| <b>Danzhou</b>          | Jin Y et al. [16]   | 2006          | 70.9<br>(12.3 , 83.9) | 0.07<br>(0.01 , 0.10) | 0.0068<br>(0.0009 , 0.1010) | 0.0472<br>(0.0014 , 0.1441) | 1.08<br>(1.02 , 1.90) | 0.10<br>(0.00 , 0.70) | 46.31   | 83.41   |
| <b>Yunnan Province</b>  |                     |               |                       |                       |                             |                             |                       |                       |         |         |
| <b>Mengla</b>           | Lu Y et al. [17]    | 2014          | 63.9<br>(12.0 , 83.5) | 0.07<br>(0.01 , 0.10) | 0.0064<br>(0.0013 , 0.0635) | 0.0612<br>(0.0024 , 0.1439) | 1.10<br>(1.03 , 1.51) | 0.10<br>(0.00 , 0.52) | 26.49   | 52.05   |
| <b>Hekou</b>            | Pu L et al. [18]    | 2016          | 65.5<br>(12.6 , 83.5) | 0.07<br>(0.01 , 0.10) | 0.0071<br>(0.0019 , 0.0569) | 0.0569<br>(0.0027 , 0.1450) | 1.11<br>(1.04 , 1.55) | 0.10<br>(0.00 , 0.50) | 39.47   | 78.80   |
| <b>Xishuangbanna</b>    | Li L et al. [19]    | 2019          | 58.3<br>(10.6 , 82.8) | 0.08<br>(0.02 , 0.10) | 0.0269<br>(0.0090 , 0.1402) | 0.0292<br>(0.0047 , 0.1427) | 1.28<br>(1.18 , 1.56) | 0.05<br>(0.00 , 0.24) | 1174.84 | 2337.87 |
| <b>Taiwan Province</b>  |                     |               |                       |                       |                             |                             |                       |                       |         |         |
| <b>% TP/TY/TN</b>       | Lee YH et al. [20]  | 2010          | 69.4<br>(11.8 , 83.7) | 0.08<br>(0.01 , 0.10) | 0.0049<br>(0.0014 , 0.0549) | 0.0246<br>(0.0032 , 0.1411) | 1.08<br>(1.04 , 1.37) | 0.10<br>(0.01 , 0.41) | 184.58  | 362.70  |
| <b>Kaohsiung</b>        | Tsai JJ et al. [21] | 2015-17       |                       |                       |                             |                             |                       |                       |         |         |
|                         |                     | 2015.8-11     | 68.3<br>(21.8 , 81.6) | 0.06<br>(0.00 , 0.10) | 0.0079<br>(0.0022 , 0.0455) | 0.0774<br>(0.0145 , 0.1455) | 1.20<br>(1.10 , 1.69) | 0.10<br>(0.01 , 0.43) | 127.08  | 256.07  |
|                         |                     | 2016.2-5      | 66.1<br>(11.0 , 83.0) | 0.07<br>(0.01 , 0.10) | 0.0155<br>(0.0046 , 0.1169) | 0.0397<br>(0.0056 , 0.1368) | 1.21<br>(1.12 , 1.55) | 0.07<br>(0.00 , 0.31) | 111.01  | 213.90  |
|                         |                     | 2016.9-2017.1 | 53.3<br>(13.4 , 83.1) | 0.06<br>(0.01 , 0.10) | 0.0141<br>(0.0036 , 0.0915) | 0.0691<br>(0.0060 , 0.1447) | 1.36<br>(1.10 , 2.17) | 0.10<br>(0.00 , 0.54) | 78.94   | 158.29  |
|                         |                     | 2017.8-9      | 68.6<br>(15.7 , 81.3) | 0.06<br>(0.01 , 0.10) | 0.0148<br>(0.0044 , 0.0957) | 0.0913<br>(0.0149 , 0.1465) | 1.30<br>(1.16 , 1.89) | 0.10<br>(0.00 , 0.37) | 67.55   | 131.94  |
| <b>Kaohsiung/Tainan</b> | Pan YH et al. [22]  | 2016          |                       |                       |                             |                             |                       |                       |         |         |
| <b>Kaohsiung</b>        |                     |               | 66.1<br>(12.3 , 81.6) | 0.07<br>(0.00 , 0.10) | 0.0276<br>(0.0043 , 0.1341) | 0.0684<br>(0.0159 , 0.1414) | 1.40<br>(1.21 , 2.28) | 0.10<br>(0.00 , 0.42) | 961.70  | 1918.96 |
| <b>Tainan</b>           |                     |               | 65.5<br>(12.5 , 83.5) | 0.07<br>(0.00 , 0.10) | 0.0181<br>(0.0022 , 0.1406) | 0.0388<br>(0.0061 , 0.1375) | 1.25<br>(1.09 , 1.99) | 0.20<br>(0.01 , 0.53) | 859.07  | 1712.92 |
| <b>Hong Kong</b>        | Lee P et al. [23]   | 2013-15       |                       |                       |                             |                             |                       |                       |         |         |
|                         |                     | 2013          | 65.4<br>(49.5 , 80.3) | 0.08<br>(0.01 , 0.10) | 0.0037<br>(0.0012 , 0.0105) | 0.0357<br>(0.0069 , 0.1322) | 1.09<br>(1.06 , 1.20) | 0.03<br>(0.00 , 0.14) | 128.19  | 259.91  |
|                         |                     | 2014          | 65.5<br>(63.1 , 67.9) | 0.08<br>(0.01 , 0.10) | 0.0028<br>(0.0012 , 0.0052) | 0.0402<br>(0.0152 , 0.0930) | 1.08<br>(1.06 , 1.15) | 0.01<br>(0.00 , 0.04) | 110.84  | 224.07  |
|                         |                     | 2015          | 65.5<br>(63.1 , 67.9) | 0.08<br>(0.01 , 0.10) | 0.0026<br>(0.0009 , 0.0053) | 0.0480<br>(0.0169 , 0.1151) | 1.09<br>(1.06 , 1.17) | 0.01<br>(0.00 , 0.50) | 108.42  | 218.93  |

Note: # GZ Huangpu represents Huangpu District in Guangzhou city; \$ QZ/FCG/HP stands for Qinzhou City, Fangchenggang City and Hepu County in Guangxi; & GY/CJ/LD represents Yunyan District of Guiyang City, Congjiang County of Southeast Guizhou Province and Luodian County of Guizhou Province; % TP/TY/TN indicates Taipei, Taoyuan and Tainan of Taiwan Province.

Table S5: Comparison of -LnL and DIC among different models (Model A-D) fitted to 31 data sets

| Survey region          | Author              | Survey Year | -LnL    |         |         |         | DIC     |         |         |         | Applicable model |
|------------------------|---------------------|-------------|---------|---------|---------|---------|---------|---------|---------|---------|------------------|
| Guangdong Province     |                     |             | Model A | Model B | Model C | Model D | Model A | Model B | Model C | Model D |                  |
| Guangzhou              | Huang Y et al. [1]  | 1981        | 123.54  | 121.66  | 122.80  | 121.71  | 249.46  | 245.36  | 240.45  | 245.20  | Model C          |
| Zhuhai                 | Li Z et al. [2]     | 1998        | 36.20   | 35.14   | 35.26   | 85.41   | 71.95   | 69.96   | 61.68   | 68.96   | Model C          |
| Zhuhai                 | Yang Z et al. [3]   | 2001        | 172.46  | 171.83  | 172.53  | 171.97  | 345.07  | 343.78  | 294.39  | 340.67  | Model C          |
| # GZ Huangpu           | Zheng X et al. [4]  | 2008        | 140.82  | 143.90  | 140.92  | 143.07  | 282.69  | 287.56  | 177.13  | 280.55  | Model C          |
| Guangzhou              | Cao Y et al. [5]    | 2011-13     |         |         |         |         |         |         |         |         |                  |
|                        |                     | 2011        | 603.41  | 605.33  | 603.45  | 605.08  | 1208.26 | 1210.97 | 1207.90 | 1198.32 | Model D          |
|                        |                     | 2012        | 519.23  | 518.33  | 518.73  | 1231.66 | 1040.36 | 1038.56 | 955.25  | 1035.76 | Model C          |
|                        |                     | 2013        | 392.85  | 391.98  | 392.87  | 391.61  | 787.48  | 785.54  | 717.46  | 778.47  | Model C          |
| Guangzhou              | Li S et al. [6]     | 2014        | 582.55  | 579.54  | 582.51  | 579.46  | 1164.52 | 1156.73 | 966.85  | 1054.96 | Model C          |
| Guangzhou              | Jing Q et al. [7]   | 2015        | 207.67  | 205.89  | 207.78  | 206.43  | 415.95  | 411.70  | 355.98  | 399.75  | Model C          |
| Guangxi Province       |                     |             |         |         |         |         |         |         |         |         |                  |
| Beihai                 | Tian X et al. [8]   | 1980        | 208.16  | 211.03  | 208.12  | 208.89  | 418.28  | 422.83  | 417.75  | 418.60  | Model A          |
| <sup>5</sup> QZ/FCG/HP | Zhou K et al. [9]   | 2010-12     | 185.91  | 184.17  | 185.87  | 184.32  | 372.55  | 368.74  | 193.52  | 309.73  | Model C          |
| Zhejiang Province      |                     |             |         |         |         |         |         |         |         |         |                  |
| Yiwu                   | Sun J et al. [10]   | 2009        | 221.27  | 217.26  | 215.09  | 217.04  | 444.86  | 436.63  | 433.33  | 432.83  | Model C          |
| Cixi                   | Cen D et al. [11]   | 2004        | 127.22  | 128.71  | 127.08  | 128.1   | 256.27  | 258.88  | 218.66  | 252.85  | Model C          |
| Hunan Province         |                     |             |         |         |         |         |         |         |         |         |                  |
| Chenzhou               | Gao L et.al. [12]   | 2005        | 51.99   | 50.45   | 50.64   | 51.48   | 105.27  | 101.58  | 101.25  | 88.01   | Model D          |
| Guizhou Province       |                     |             |         |         |         |         |         |         |         |         |                  |
| Guiyang                | Gao R et al. [13]   | 2004-05     | 672.49  | 669.62  | 672.33  | 669.78  | 1346.25 | 1339.97 | 1339.04 | 1338.69 | Model B          |
| Guiyang                | Tian H et al. [14]  | 2005        | 204.78  | 201.53  | 204.61  | 201.76  | 410.90  | 403.67  | 362.19  | 392.70  | Model C          |
| & GY/CJ/LD             | Jiang W et al. [15] | 2011        | 59.94   | 58.17   | 57.27   | 57.11   | 120.93  | 117.36  | 80.41   | 103.69  | Model C          |
| Hainan Province        |                     |             |         |         |         |         |         |         |         |         |                  |
| Danzhou                | Jin Y et al. [16]   | 2006        | 45.15   | 45.10   | 46.05   | 46.31   | 89.21   | 88.84   | 53.5    | 83.41   | Model C          |
| Yunnan Province        |                     |             |         |         |         |         |         |         |         |         |                  |
| Mengla                 | Lu Y et al. [17]    | 2014        | 26.48   | 26.05   | 26.54   | 26.49   | 52.97   | 51.99   | 46.74   | 52.05   | Model C          |
| Hekou                  | Pu L et al. [18]    | 2016        | 39.51   | 39.24   | 39.58   | 39.47   | 79.88   | 79.23   | 72.62   | 78.80   | Model C          |
| Xishuangbanna          | Li L et al. [19]    | 2019        | 1178.3  | 1174.73 | 1178.12 | 1174.84 | 2358.14 | 2349.94 | 2321.00 | 2337.87 | Model C          |

|                         |                     |               |        |        |        |        |         |         |         |         |         |
|-------------------------|---------------------|---------------|--------|--------|--------|--------|---------|---------|---------|---------|---------|
| <b>Taiwan Province</b>  |                     |               |        |        |        |        |         |         |         |         |         |
| % TP/TY/TN              | Lee YH et al. [20]  | 2010          | 184.93 | 185.17 | 184.95 | 184.58 | 374.11  | 371.79  | 278.49  | 362.70  | Model C |
| <b>Kaohsiung</b>        | Tsai JJ et al. [21] | 2015-17       |        |        |        |        |         |         |         |         |         |
|                         |                     | 2015.8-11     | 128.97 | 130.86 | 127.49 | 127.08 | 260.08  | 263.05  | 238.28  | 256.07  | Model C |
|                         |                     | 2016.2-5      | 111.18 | 111.74 | 109.39 | 111.01 | 223.49  | 225.02  | 220.42  | 213.90  | Model D |
|                         |                     | 2016.9-2017.1 | 78.47  | 78.95  | 78.63  | 78.94  | 157.37  | 158.18  | 155.99  | 158.29  | Model A |
|                         |                     | 2017.8-9      | 69.62  | 71.24  | 69.28  | 67.55  | 141.19  | 143.92  | 114.74  | 131.94  | Model C |
| <b>Kaohsiung/Tainan</b> | Pan YH et al. [22]  | 2016          |        |        |        |        |         |         |         |         |         |
| <b>Kaohsiung</b>        |                     |               | 961.22 | 963.13 | 961.12 | 961.7  | 1924.29 | 1927.82 | 1922.57 | 1918.96 | Model C |
| <b>Tainan</b>           |                     |               | 858.61 | 859.77 | 858.53 | 859.07 | 1719.13 | 1721.15 | 1718.03 | 1712.92 | Model C |
| <b>Hong Kong</b>        | Lee P et al. [23]   | 2013-15       |        |        |        |        |         |         |         |         |         |
|                         |                     | 2013          | 132.91 | 133.24 | 132.62 | 128.19 | 267.96  | 268.73  | 233.79  | 259.91  | Model C |
|                         |                     | 2014          | 121.16 | 120.86 | 113.46 | 110.84 | 244.59  | 244.05  | 213.28  | 224.07  | Model C |
|                         |                     | 2015          | 118.30 | 118.23 | 109.87 | 108.42 | 238.80  | 238.72  | 213.16  | 218.93  | Model C |

Note: #GZ Huangpu represents Huangpu District in Guangzhou city; \$QZ/FCG/HP stands for Qinzhou City, Fangchenggang City and Hepu County in Guangxi; &GY/CJ/LD represents Yunyan District of Guiyang City, Congjiang County of Southeast Guizhou Province and Luodian County of Guizhou Province; %TP/TY/TN indicates Taipei, Taoyuan and Tainan of Taiwan Province.

---

### 3. References

1. Huang Y, Liang J, Lin Z. [Survey of dengue anti-antibody level in population after dengue fever epidemic in Guangzhou]. *Guangzhou Medical Journal*. 1983(02):20-25.
2. Li Z, Zhang J, Ma H. [Surveillance of Dengue Fever Antibody Levels in People in Zhuhai Port Area]. *Chinese Journal of Frontier Health and Quarantine*. 1999(03):141-143. DOI: 10.16408/j.1004-9770.1999.03.003.
3. Yang Z, Zhu H, Lin G, Zeng W, Tu C, Ye L, Zhao j, Yao R. [Analysis of dengue antibody levels and related factors in different populations]. *Modern Preventive Medicine*. 2002(05):694-695. DOI: 10.3969/j.issn.1003-8507.2002.05.066.
4. Zheng X, Wu Y, Zhang M, He A, Li Z, Qu Z, Zhan X. [Sero-epidemiological Investigation of Dengue Fever in Guangzhou]. *Journal of Tropical Medicine*. 2009,9(12):1397-1399+1404.
5. Cao Y, Jiang L, Xu Y, Jing Q, Cao Q, Di B, Yang Z. [Monitoring and analysis of dengue fever serum antibody levels in Guangzhou from 2011 to 2013]. *South China Journal of Preventive Medicine*. 2015,41(04):364-366. DOI: 10.13217/j.scjpm.2015.0364.
6. Li S, Liao Q, Liang Y, Chen J, You R, Xiong H, Huang K, Rong X. [Study on the risk of dengue virus transmission by blood transfusion in Guangzhou area]. *Guangdong Medical Journal*. 2017,38(07):1064-1067. DOI: 10.3969/j.issn.1001-9448.2017.07.025.
7. Jing Q, Li Y, Liu J, Jiang L, Chen Z, Su W, Birkhead GS, Lu J, Yang Z. Dengue Underestimation in Guangzhou, China: Evidence of Seroprevalence in Communities With No Reported Cases Before a Large Outbreak in 2014. *Open Forum Infect Dis*. 2019 Jun 3;6(7):ofz256. doi: 10.1093/ofid/ofz256.
8. Tian X, Ai C, Li C, Wen Y, Liu Y, Xia H. [Epidemiological surveillance of dengue fever in Beihai City, Guangxi]. *Journal of Military Medical Sciences*. 1985(04):387-392.
9. Zhou K, Chen M, Tan Y, Mo Y, Bi Y. [Serological surveillance of healthy population in Guangxi dengue surveillance sites]. *Journal of Applied Preventive Medicine*. 2013,19(04):236-237. DOI: 10.3969/j.issn.1673-758X.2013.04.018.
10. Sun J, Luo S, Lin J, Chen J, Hou J, Fu T, Lv H, Chen Z, Cong L, Ling F, et al. Inapparent infection during an outbreak of dengue fever in Southeastern China. *Viral Immunol*. 2012 Dec;25(6):456-60. doi: 10.1089/vim.2012.0039.
11. Cen D, Wu J, Xu Y. [Application of Serum Bank in the Investigation and Analysis of Dengue Fever Antibody Level]. *Chinese Preventive Medicine*. 2007(06):734-735. DOI: 10.3969/j.issn.1009-6639.2007.06.022.
12. Gao L, Xiao J, Zhang H, Duan L, Liu F, Dai D, Li J, Deng Z. [Sero-epidemiology investigation of dengue fever in Chenzhou]. *South China Journal of Preventive Medicine*. 2007(05):34-35. DOI: 10.3969/j.issn.1671-5039.2007.05.011.
13. Gao R, Zhou X, Zhou C, Han Y, Luo J, Qin J. [Serological Epidemiological Research on Dengue Virus Antibodies among Personnel at Guiyang Port]. *Chinese Journal of Frontier Health and Quarantine*. 2006(S1):57-59. DOI: 10.3969/j.issn.1004-9770.2006.z1.017.
14. Tian H, Han Y, Dai A, Fu D, Zhou Y, Zhou N, Gao R. [The Investigation of the Population Infected with Dengue Virus at Guiyang

- 
- Port and other Close Areas]. *Journal of Travel Medicine Science*. 2007(04):28-29. DOI: 10.3969/j.issn.1006-7159.2007.04.009.
15. Jiang W, Zhou J, Tang G, Zhuang Y, Yun C, Fu L. [Investigation on Dengue Fever Infection among Healthy Population in Some Counties and Cities in Guizhou Province]. *Guizhou Medical Journal*. 2013,37(02):164-165. DOI: 10.3969/j.ISSN.1000-744X.2013.02.028.
  16. Jin Y, Sun L, Zeng X, Wu W, Ma Y, Su X, Lao S, Chen Y, Li Z. [Sero-epidemiological survey and analysis on dengue fever in Hainan Province]. *China Tropical Medicine*. 2007(11):2007-2008. DOI: 10.3969/j.issn.1009-9727.2007.11.014.
  17. Lu Y, Liu Y, Ji R, Luo Z, Zhang Q, Zhou L, Yang X. [Serological surveillance on arboviral diseases among exit-entry population at Sino-Laos port]. *Chinese Journal of Frontier Health and Quarantine*. 2016,39(03):180-182. DOI: 10.16408/j.1004-9770.2016.03.008.
  18. Pu L, Chen J, Zhang Q, Zhang C, Li Z, Liu W, Wu Z. [Aedes surveillance and dengue fever serological survey at Sino-Vietnam Hekou-Laocai ports]. *Chinese Journal of Frontier Health and Quarantine*. 2018,41(04):255-257+268. DOI: 10.16408/j.1004-9770.2018.04.008.
  19. Li L, Li Y, Lu S, Dong J, Xu H, Zhang Q, Weng R, Yin Y, He R, Fang P, et al. Epidemiological survey and screening strategy for dengue virus in blood donors from Yunnan Province. *BMC Infect Dis*. 2021 Jan 22;21(1):104. doi: 10.1186/s12879-021-05810-8.
  20. Lee YH, Hsieh YC, Chen CJ, Lin TY, Huang YC. Retrospective Seroepidemiology study of dengue virus infection in Taiwan. *BMC Infect Dis*. 2021 Jan 21;21(1):96. doi: 10.1186/s12879-021-05809-1.
  21. Tsai JJ, Liu CK, Tsai WY, Liu LT, Tyson J, Tsai CY, Lin PC, Wang WK. Seroprevalence of dengue virus in two districts of Kaohsiung City after the largest dengue outbreak in Taiwan since World War II. *PLoS Negl Trop Dis*. 2018 Oct 24;12(10):e0006879. doi: 10.1371/journal.pntd.0006879.
  22. Pan YH, Liao MY, Chien YW, Ho TS, Ko HY, Yang CR, Chang SF, Yu CY, Lin SY, Shih PW, Shu PY, Chao DY, Pan CY, Chen HM, Perng GC, Ku CC, King CC. Use of seroprevalence to guide dengue vaccination plans for older adults in a dengue non-endemic country. *PLoS Negl Trop Dis*. 2021 Apr 1;15(4):e0009312. doi: 10.1371/journal.pntd.0009312.
  23. Lee P, Yeung ACM, Chen Z, Chan MCW, Sze KH, Chan PKS. Age-specific seroprevalence of dengue infection in Hong Kong. *J Med Virol*. 2018 Sep;90(9):1427-1430. doi: 10.1002/jmv.25216.
